# Supplementary material for: Canonical nucleators are dispensable for stress granule assembly in Drosophila intestinal progenitors
Source: Oxford University Press journal article supplement (doi:10.1242/jcs.243451), 2020-04-07
Supplement: jcs243451supp.pdf [file jcs243451supp.pdf]

## Buddika 2020 Supplementary Figures

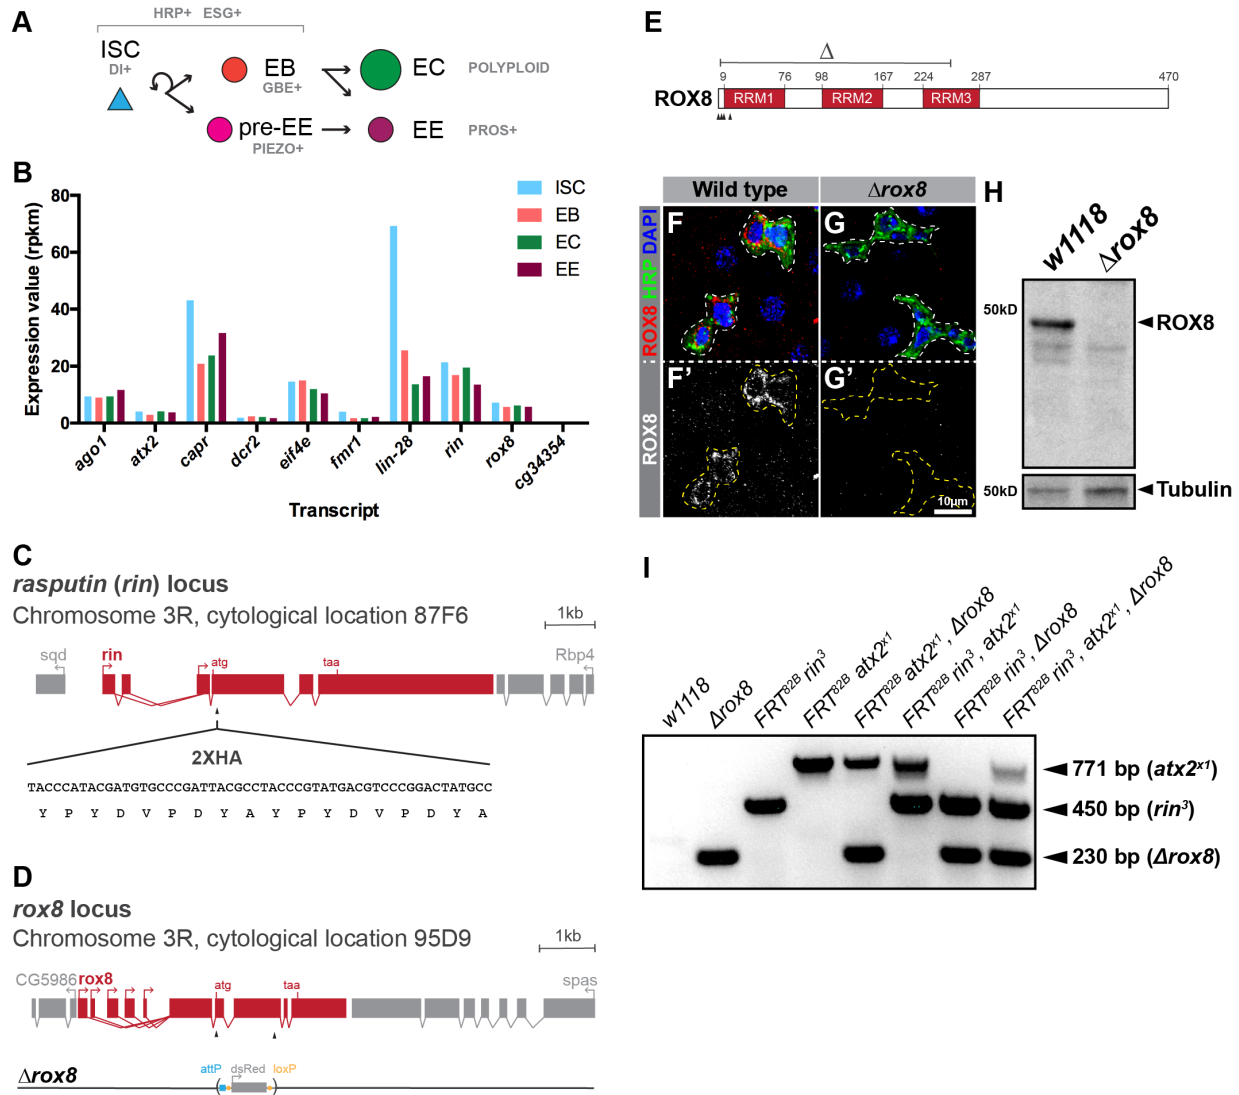

**Figure S1:** Background and reagent information relevant to this study. (A) Schematic showing the ISC lineage as well as markers used to label cell types in this lineage. (B) A histogram showing transcript expression levels of genes analyzed in this study based on data from Dutta et al., 2013. Note that *CG34354*, a likely paralog of *rox8*, is not expressed in intestinal cells. (C) Schematic of the *rin* locus, including the location of the gRNA (arrowhead) used to insert 2XHA sequence. (D) Schematic of the wildtype *rox8* locus (top) and the  $\Delta$ *rox8* mutant locus (bottom) generated via CRISPR/cas9 mutagenesis using two gRNAs and a repair plasmid. Arrowheads indicate the locations of the gRNAs. (E) Schematic of the ROX8 protein, which is 470 amino acids long and

encodes three RNA recognition motifs (RRMs) in its N-terminal half. The portion deleted by the  $\Delta rox8$  deletion is indicated ( $\Delta$ ). In addition to the  $\Delta$  deletion, four additional alleles were generated that disrupt the predicted reading frame after the first, second, fourth, and nineteenth amino acids (indicated by arrowheads). However, none of these mutations affected ROX8 accumulation as detected by Western blot, suggesting that the currently annotated start methionine may not be used (although the next downstream methionine is located 20 amino acids into the 68 amino acid RRM1 domain. (F-G) Confocal micrographs of epithelial sections from (F) wild type or (G)  $\Delta rox8$  intestines stained for ROX8 (red in F-G, white in F'-G'), HRP (green) and DAPI (blue). Note that  $\Delta rox8$  intestinal progenitor cells have no visible ROX8 staining. (H) Western blot of  $w^{1118}$  (control) and  $\Delta rox8$  whole animal extracts probed with ROX8 (top panel) or Tubulin (bottom panel) antibodies. (I) An agarose gel showing the PCR-based verification of each single, double and triple mutants that were used in the current study. A 771bp, 450bp, and/or 230bp product confirms the presence of the  $atx2^{X1}$ ,  $rin^3$ , and/or  $\Delta rox8$  mutation, respectively.

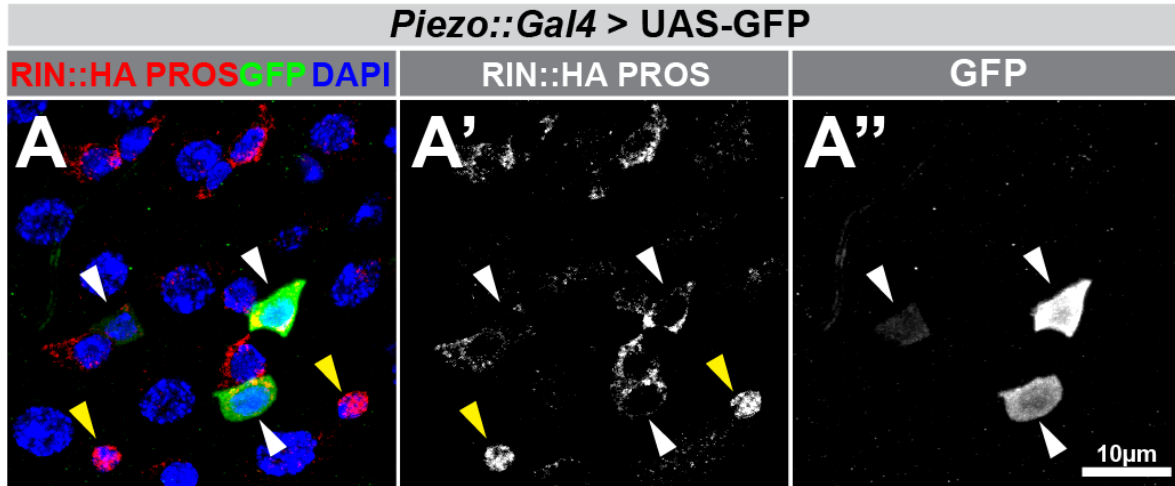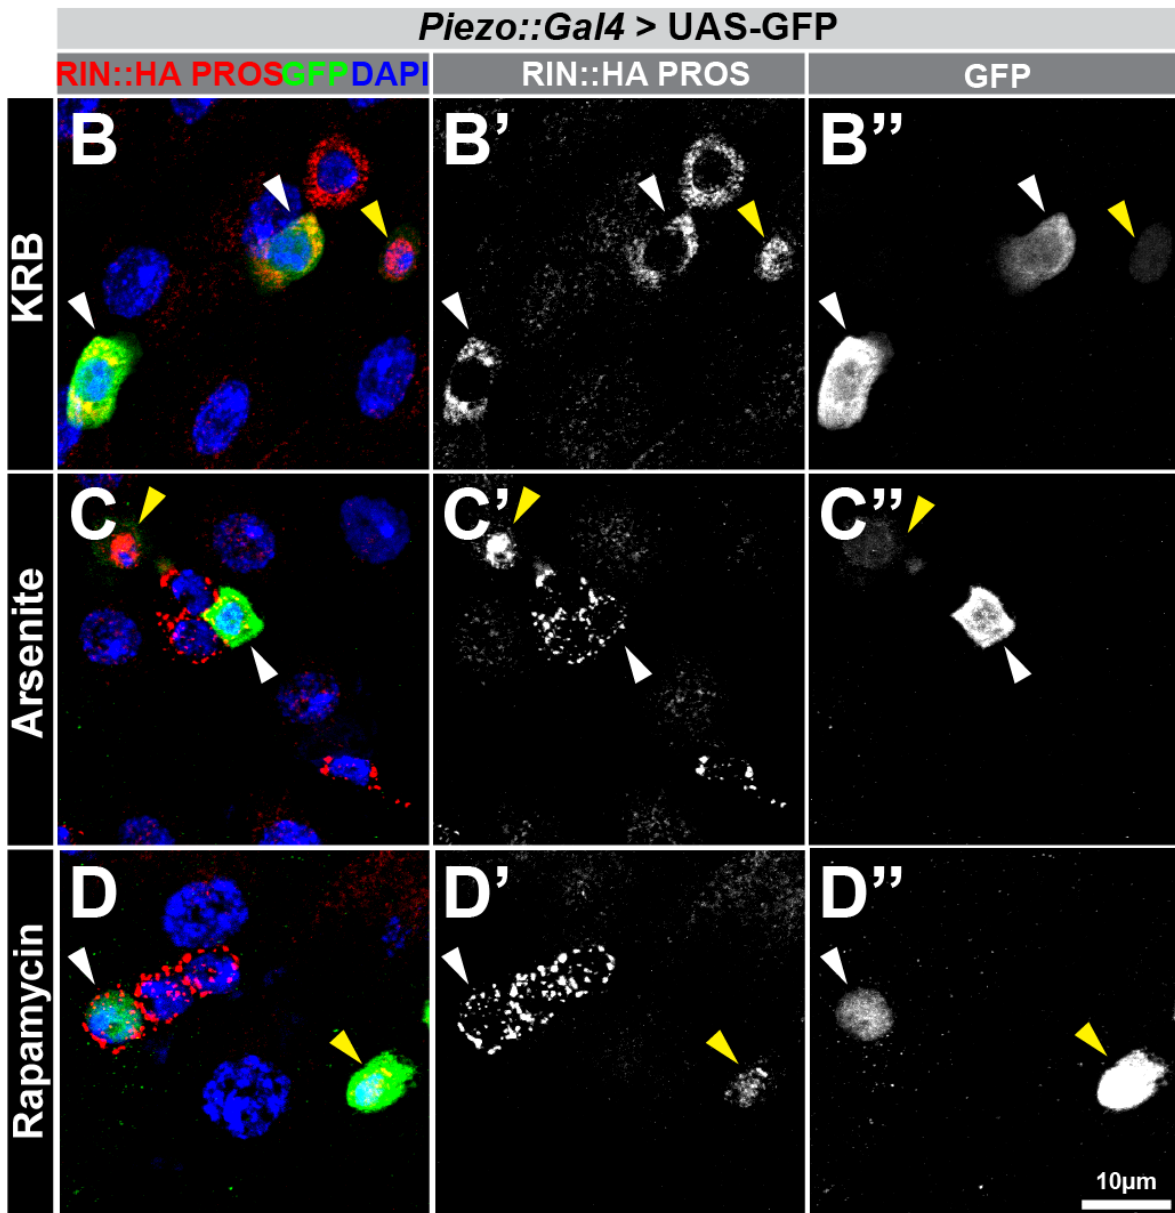

**Figure S2:** Stress granule proteins are expressed in EE precursors and are capable of assembling into mature stress granules following acute stress. (A) Confocal fluorescent micrographs of *piezo-Gal4>UAS-GFP* intestines stained for RIN-HA (red in A, white in A'), Prospero (red in A, white in A'), GFP (green in A, white in A''), and DAPI. While both RIN::HA and Pros were detected in the red channel, they could be distinguished based on distinct subcellular localization: RIN::HA was cytoplasmic while Pros was nuclear. Note that cytoplasmic RIN-HA staining was detected in Pros<sup>-</sup>, *piezo*<sup>+</sup> EE precursors (white arrowheads in A') but not mature Pros<sup>+</sup>, *piezo*<sup>-</sup> EEs (yellow arrowheads in A'). (B-D) Confocal fluorescent micrographs of *piezo-Gal4>UAS-GFP* intestines treated with (B) KRB, (C) 1mM sodium arsenite, or (D) 1mM rapamycin and stained for RIN::HA (red in B-D, white in B'-D'), Pros (nuclear red in B-D, white in B'-D'), GFP (green in B-D, white in B''-D'') and DAPI (blue).

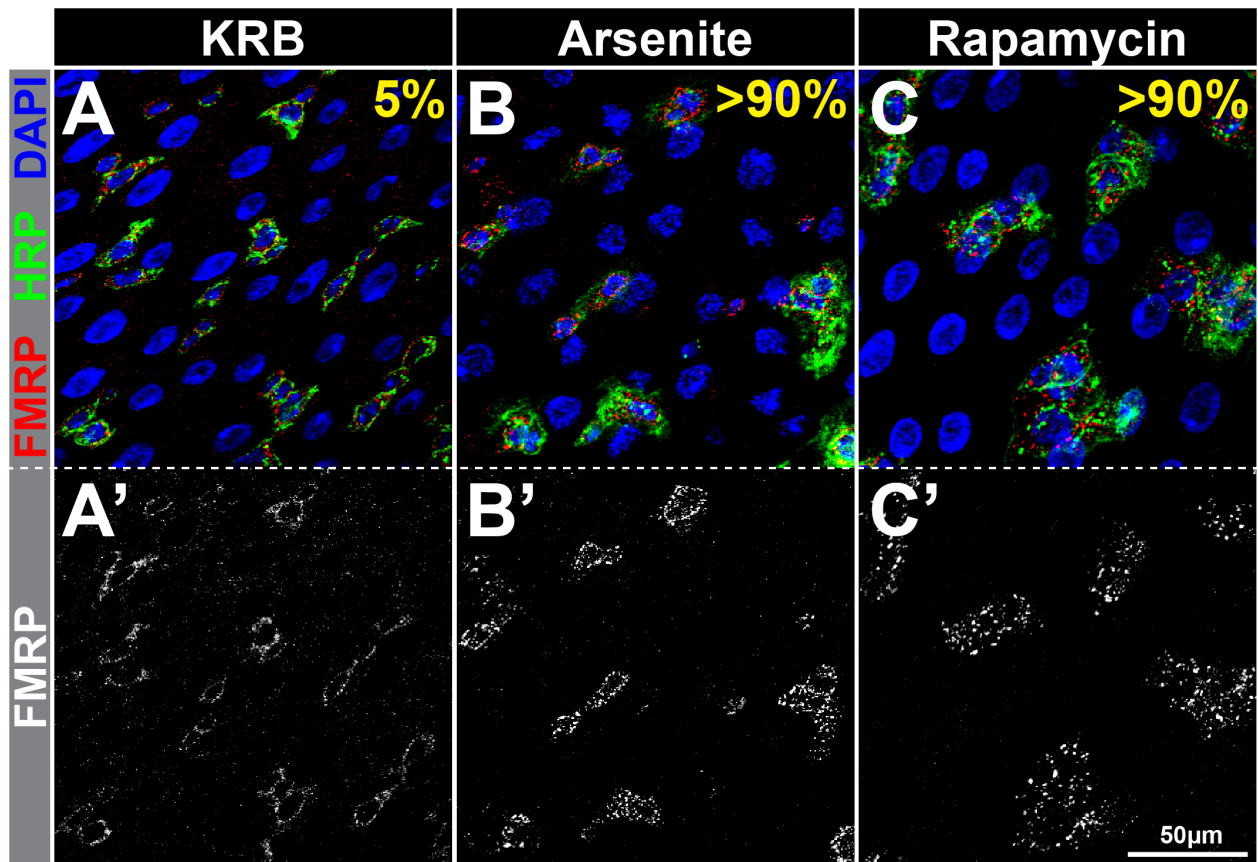

**Figure S3:** IPSGs are detected in >90% of intestinal progenitors after arsenite or rapamycin treatment. Fluorescent micrographs of a field of cells in the R5 region of wild type *Drosophila* intestines exposed to (A) KRB, (B) 1mM sodium arsenite or (C) 1mM rapamycin and stained for FMRP (red), HRP (green), and DAPI (blue). Single channel images of FMRP staining are shown in A'-C'. The numbers in yellow indicate quantification of the percentage of intestinal progenitors per field of view that display stress granules (n=5 intestines per condition).

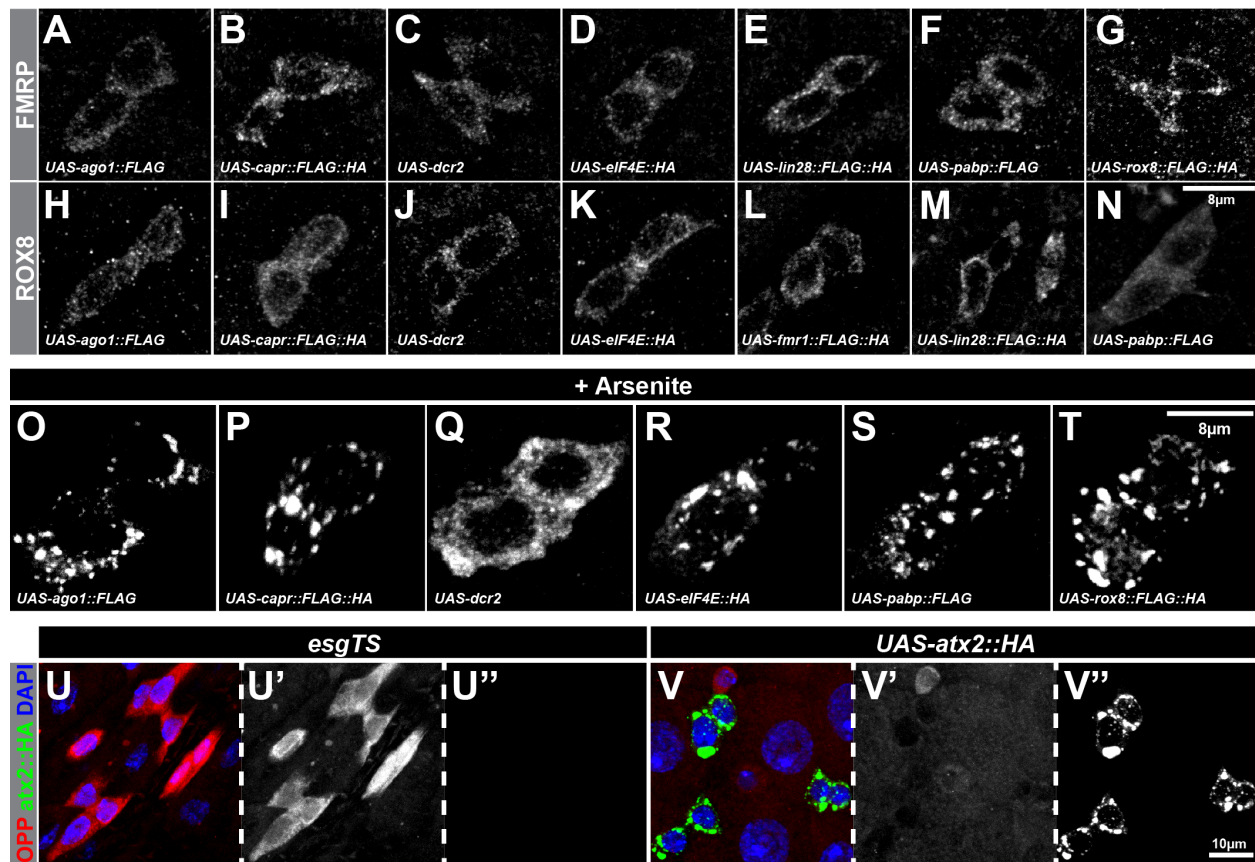

**Figure S4:** Forced expression of AGO1, CAPR, DCR2, eIF4E, FMRP, LIN-28, pABP or ROX8 does not lead to IPSP formation. Gray scale images of pairs of progenitor cells from intestines harboring *esg-Gal4* and (A, H) *UAS-ago1::FLAG*, (B, I) *UAS-capr::FLAG::HA*, (C, J) *UAS-dcr2*, (D, K) *UAS-eIF4E::HA*, (E, M) *UAS-lin-28::FLAG::HA*, (F, N) *UAS-pabp::FLAG*, (G) *UAS-rox8::FLAG::HA*, or (L) *UAS-FMR1::FLAG::HA* and stained for (A-G) FMRP or (H-N) ROX8. Note that overexpression of any of the above components fails to alter FMRP or ROX8 expression profiles, indicating that the above components are not sufficient for IPSP formation. (O-T) Gray scale confocal micrographs of 1mM sodium arsenite exposed progenitor cell pairs harboring *esg-Gal4* and (O) *UAS-ago1::FLAG*, (P) *UAS-capr::FLAG::HA*, (Q) *UAS-dcr2*, (R) *UAS-eIF4E::HA*, (S) *UAS-pabp::FLAG*, (T) *UAS-rox8::FLAG::HA* and stained for (O-P, S-T) FLAG, (Q) DCR2 or (R) HA. (U-V) Fluorescent confocal micrographs of (U) control or (V) ATX2-overexpressing intestinal progenitor cells that are stained for (U-V and U'-V') OPP (red and gray), (U-V and U''-V'') HA (green and gray) and (U-V) DAPI. Note that ATX2 overexpressing cells have reduced OPP-staining indicating that nascent protein synthesis is downregulated.

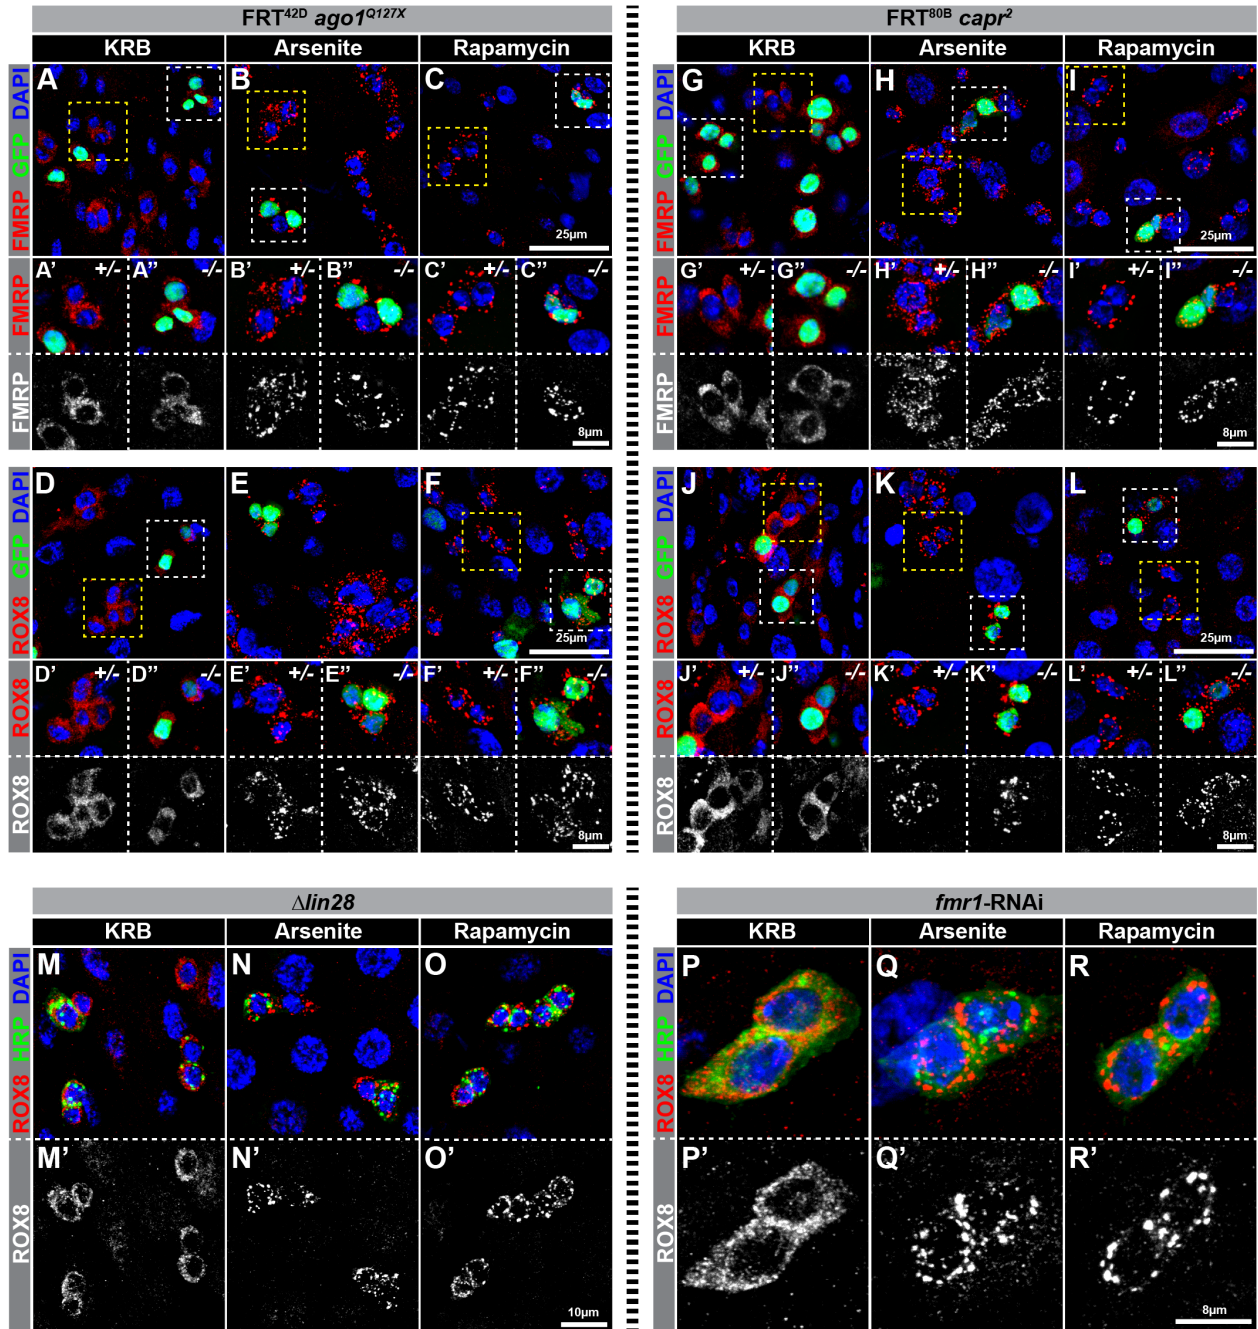

**Figure S5:** IPSGs form in intestinal progenitors deficient for *ago1*, *capr*, *lin-28* or *fmr1*. (A-L) Confocal micrographs of intestinal cells homozygous (white boxes) or heterozygous (yellow boxes) for (A-F) *ago1<sup>Q127X</sup>* or (G-L) *capr<sup>2</sup>* null alleles and exposed to (A, D, G, J) KRB, (B, E, H, K) 1mM sodium arsenite, or (C, F, I, L) 1mM rapamycin and stained for (A-C, G-I) FMRP (red) or (D-F, J-L) ROX8 (red), (A-L) GFP (green) and (A-L) DAPI (blue). (A'-L') and (A''-L'') show insets of progenitor cells that are

heterozygous (GFP negative and outlined with the yellow box) or homozygous (GFP positive and outlined with the white box) for the *ago1*<sup>Q127X</sup> (A-F) or *capr2* (G-L) null allele. (M-O) Posterior midgut epithelia of  $\Delta$ *lin-28* intestines treated with (M) KRB, (N) 1mM sodium arsenite, or (O) 1mM rapamycin and stained for ROX8 (red in M-O, white in M'-O'), HRP (green), and DAPI (blue). (P-R) Pairs of intestinal progenitors from *esg-Gal4*, *UAS-fmr1-RNAi* intestines exposed to (P) KRB, (Q) 1mM sodium arsenite or (R) 1mM rapamycin and stained for ROX8 (red in P-R, white in P'-R'), HRP (green), and DAPI (blue). Note that IPSGs are formed in progenitors lacking either AGO1, CAPR, LIN-28 or FMRP.



## Supplementary Tables

**Table S1: Fly strains used in this study**

| Figure  | Panels                                                                                 | Genotypes of flies used in each panel                                                                                                                                              |
|---------|----------------------------------------------------------------------------------------|------------------------------------------------------------------------------------------------------------------------------------------------------------------------------------|
| Fig. 1  | A, C-D, F-G, I-J                                                                       | <i>gbe-smGFP::V5::nls / +</i>                                                                                                                                                      |
|         | B                                                                                      | <i>gbe::LacZ / + ; atx2::GFP / +</i>                                                                                                                                               |
|         | E                                                                                      | <i>gbe-smGFP::V5::nls / + ; lin-28<sup>Δ1</sup> , M{attP, lin-28<sup>RC</sup>}ZH-86Fb / +</i>                                                                                      |
|         | H                                                                                      | <i>gbe-smGFP::V5::nls / + ; HA::rin / +</i>                                                                                                                                        |
| Fig. 2  | A-D, F-G, I-J, L-M, O-P                                                                | <i>w<sup>1118</sup></i>                                                                                                                                                            |
|         | E                                                                                      | <i>esg-Gal4 UAS-GFP tubGal80<sup>ts</sup> / +</i>                                                                                                                                  |
|         | H                                                                                      | <i>atx2::GFP / +</i>                                                                                                                                                               |
|         | K                                                                                      | <i>lin-28<sup>Δ1</sup> , M{attP, lin-28<sup>RV</sup>}ZH-86Fb / +</i>                                                                                                               |
|         | N                                                                                      | <i>HA::rin / +</i>                                                                                                                                                                 |
| Fig. 3  | A-F                                                                                    | <i>HA::rin</i>                                                                                                                                                                     |
| Fig. 4  | A-O                                                                                    | <i>HA::rin</i>                                                                                                                                                                     |
| Fig. 5  | A-E, K-M                                                                               | <i>esg-Gal4 UAS-GFP tubGal80<sup>ts</sup> / +</i>                                                                                                                                  |
|         | F-J, N-O                                                                               | <i>HA::rin</i>                                                                                                                                                                     |
| Fig. 6  | A                                                                                      | <i>esg-Gal4 UAS-GFP tubGal80<sup>ts</sup> / UAS-ago1::3xFLAG</i>                                                                                                                   |
|         | B, K-Q                                                                                 | <i>esg-Gal4 UAS-GFP tubGal80<sup>ts</sup> / + ; {UAS-atx2::3xHA}ZH-86Fb (F001031) / +</i>                                                                                          |
|         | C                                                                                      | <i>esg-Gal4 UAS-GFP tubGal80<sup>ts</sup> / UAS-capr::FLAG::HA</i>                                                                                                                 |
|         | D                                                                                      | <i>esg-Gal4 UAS-GFP tubGal80<sup>ts</sup> / UAS-dcr2</i>                                                                                                                           |
|         | E                                                                                      | <i>esg-Gal4 UAS-GFP tubGal80<sup>ts</sup> / + ; {UAS-eIF4E::3xHA}ZH-86Fb (F000955) / +</i>                                                                                         |
|         | F                                                                                      | <i>UAS-fmr1::FLAG::HA / + ; esg-Gal4 UAS-GFP tubGal80<sup>ts</sup> / +</i>                                                                                                         |
|         | G                                                                                      | <i>UAS-lin28::FLAG::HA / + ; esg-Gal4 UAS-GFP tubGal80<sup>ts</sup> / +</i>                                                                                                        |
|         | H                                                                                      | <i>esg-Gal4 UAS-GFP tubGal80<sup>ts</sup> / + ; UAS-pabp::FLAG / +</i>                                                                                                             |
|         | I                                                                                      | <i>esg-Gal4 UAS-GFP tubGal80<sup>ts</sup> / + ; UAS-rin::3xHA / +</i>                                                                                                              |
|         | J                                                                                      | <i>esg-Gal4 UAS-GFP tubGal80<sup>ts</sup> / UAS-rox8::FLAG::HA</i>                                                                                                                 |
| Fig. 7  | A-F                                                                                    | <i>hsFLP<sup>12</sup> , tubGAL4, UAS-GFP / + ; P{lin-28 13kb::mCherry}attP40 / + ; FRT<sup>82B</sup> tubP-GAL80<sup>LL3</sup> / FRT82B atx2<sup>x1</sup></i>                       |
|         | G-L                                                                                    | <i>hsFLP<sup>12</sup> , tubGAL4, UAS-GFP / + ; P{lin-28 13kb::mCherry}attP40 / + ; FRT<sup>82B</sup> tubP-GAL80<sup>LL3</sup> / FRT82B rin<sup>3</sup></i>                         |
|         | M-O                                                                                    | <i>Δrox8</i>                                                                                                                                                                       |
|         | P-T                                                                                    | <i>hsFLP<sup>12</sup> , tubGAL4, UAS-GFP ; P{lin-28 13kb::mCherry}attP40 / + ; FRT<sup>82B</sup> tubP-GAL80<sup>LL3</sup> / FRT82B rin<sup>3</sup> , atx2<sup>x1</sup> , Δrox8</i> |
| Fig. S1 | F, H, I                                                                                | <i>w1118</i>                                                                                                                                                                       |
|         | G-I                                                                                    | <i>Δrox8</i>                                                                                                                                                                       |
|         | I                                                                                      | <i>hsFLP<sup>12</sup> , tubGAL4, UAS-GFP / + ; P{lin-28 13kb::mCherry}attP40 / + ; FRT<sup>82B</sup> tubP-GAL80<sup>LL3</sup> / FRT82B rin<sup>3</sup></i>                         |
|         | I                                                                                      | <i>hsFLP<sup>12</sup> , tubGAL4, UAS-GFP / + ; P{lin-28 13kb::mCherry}attP40 / + ; FRT<sup>82B</sup> tubP-GAL80<sup>LL3</sup> / FRT82B atx2<sup>x1</sup></i>                       |
|         | I                                                                                      | <i>hsFLP<sup>12</sup> , tubGAL4, UAS-GFP / + ; P{lin-28 13kb::mCherry}attP40 / + ; FRT<sup>82B</sup> tubP-GAL80<sup>LL3</sup> / FRT82B atx2<sup>x1</sup> , Δrox8</i>               |
|         | I                                                                                      | <i>hsFLP<sup>12</sup> , tubGAL4, UAS-GFP / + ; P{lin-28 13kb::mCherry}attP40 / + ; FRT<sup>82B</sup> tubP-GAL80<sup>LL3</sup> / FRT82B rin<sup>3</sup> , atx2<sup>x1</sup></i>     |
| I       | <i>hsFLP<sup>12</sup> , tubGAL4, UAS-GFP / + ; P{lin-28 13kb::mCherry}attP40 / + ;</i> |                                                                                                                                                                                    |

|         |         |                                                                                                                                                                                   |
|---------|---------|-----------------------------------------------------------------------------------------------------------------------------------------------------------------------------------|
|         |         | <i>FRT<sup>82B</sup> tubP-GAL80<sup>LL3</sup>/FRT82B rin<sup>3</sup>, Δrox8</i>                                                                                                   |
|         | I       | <i>hsFLP<sup>12</sup>, tubGAL4, UAS-GFP / + ; P{lin-28 13kb::mCherry}attP40 / + ; FRT<sup>82B</sup> tubP-GAL80<sup>LL3</sup>/FRT82B rin<sup>3</sup>, atx2<sup>X1</sup>, Δrox8</i> |
| Fig. S2 | A-D     | <i>piezo::Gal4, UAS-GFP, tubGal80<sup>ts</sup> / + ; HA::rin / +</i>                                                                                                              |
| Fig. S3 | A-C     | <i>w1118</i>                                                                                                                                                                      |
| Fig. S4 | A, H, O | <i>esg-Gal4 UAS-GFP tubGal80<sup>ts</sup> / UAS-ago1::3xFLAG</i>                                                                                                                  |
|         | B, I, P | <i>esg-Gal4 UAS-GFP tubGal80<sup>ts</sup> / UAS-capr::FLAG::HA</i>                                                                                                                |
|         | C, J, Q | <i>esg-Gal4 UAS-GFP tubGal80<sup>ts</sup> / UAS-dcr2</i>                                                                                                                          |
|         | D, K, R | <i>esg-Gal4 UAS-GFP tubGal80<sup>ts</sup> / + ; {UAS-eIF4E::3xHA}ZH-86Fb (F000955) / +</i>                                                                                        |
|         | L       | <i>UAS-fmr1::FLAG::HA / + ; esg-Gal4 UAS-GFP tubGal80<sup>ts</sup> / +</i>                                                                                                        |
|         | E, M    | <i>UAS-lin28::FLAG::HA / + ; esg-Gal4 UAS-GFP tubGal80<sup>ts</sup> / +</i>                                                                                                       |
|         | F, N, S | <i>esg-Gal4 UAS-GFP tubGal80<sup>ts</sup> / + ; UAS-pabp::FLAG / +</i>                                                                                                            |
|         | G, T    | <i>esg-Gal4 UAS-GFP tubGal80<sup>ts</sup> / UAS-rox8::FLAG::HA</i>                                                                                                                |
|         | U-V     | <i>esg-Gal4 UAS-GFP tubGal80<sup>ts</sup> / + ; {UAS-atx2::3xHA}ZH-86Fb (F001031) / +</i>                                                                                         |
|         | Fig. S5 | A-F                                                                                                                                                                               |
| G-L     |         | <i>hsFLP<sup>12</sup>, tubGAL4, UAS-GFP / + ; ; FRT<sup>80B</sup> tubP-GAL80<sup>LL3</sup>/FRT80B capr<sup>2</sup></i>                                                            |
| M-O     |         | <i>lin-28<sup>A1</sup></i>                                                                                                                                                        |
| P-R     |         | <i>esg-Gal4 UAS-GFP tubGal80<sup>ts</sup> / + ; UAS-fmr1-RNAi (P{KK107935}VIE-260B) / +</i>                                                                                       |

**Table S2: Oligos used in this study**

| No.  | Sequence                                                                                                                                                                                                              | Additional Information                                                       |
|------|-----------------------------------------------------------------------------------------------------------------------------------------------------------------------------------------------------------------------|------------------------------------------------------------------------------|
| 3144 | GTTCGAAATCGATAAGCTTGGATC                                                                                                                                                                                              | Reverse oligo to dsRed                                                       |
| 3202 | AGCTCTGGAAACCGGTTATGCGAGTGCACCTGGAAACCGGTTATGCG<br>AGTTAACTTGGAAACCGGTTATGCGAGAGCTAAACTTACTTTTCAGCTCG<br>GTTCCACGCCACTGCAAACTTACTTTTCAGCTCGGTTCCACGCCACA<br>AGCTTGCATGACGT                                            | Top oligo that encodes 3XGBE<br>and 2XSu(h) binding sites                    |
| 3203 | CATGCAAGCTTGTGGCGTGGGAACCGAGCTGAAAGTAAGTTTTGCAGT<br>GGCGTGGGAACCGAGCTGAAAGTAAGTTTAGCTCTCGCATAACCGGTT<br>TCCAAGTAACTCGCATAACCGGTTTCCAAGTGCACCTCGCATAACCGGT<br>TTCCAAG                                                  | Bottom oligo that encodes 3XGBE<br>and 2XSu(h) binding sites                 |
| 3402 | AAGAGCAGGCACAGAAGGCATCGCC                                                                                                                                                                                             | Amplifies <i>tra</i> nls from genomic<br>DNA paired with 3421                |
| 3412 | GCGCTGGCGATGCCTTCTGTGCCTGCTCTTGGTACTATCCAGTCCAGC<br>AACGGGTTCCGG                                                                                                                                                      | Amplifies smGFP::V5 from<br>pJFRC206 paired with 3416                        |
| 3416 | TCCTTACTTCAGGCGGCCGCGGCTCGAGCAAAACATGGGAAAACCTA<br>TACCGAACCCCC                                                                                                                                                       | Amplifies smGFP::V5 from<br>pJFRC206 paired with 3412                        |
| 3421 | AGTAAGGTTCTTACAAAAGATCCTCTAGATACTTGTACAAGTTAGCGT<br>CTTCGTTC                                                                                                                                                          | Amplifies <i>tra</i> nls from genomic<br>DNA paired with 3402                |
| 3887 | GAATACAAGAAGAGAAGTCTGAATAACATGTATCCAGTTGGACAACAG<br>TCACAG                                                                                                                                                            | Forward oligo to amplify <i>ago1</i><br>from SD07515 into pattB plasmid      |
| 3888 | TAGTCGCCGTCGTGATCCTTGTAAATCCGAACCGGCAAAGTACATGACCT<br>TCTTGGTATCC                                                                                                                                                     | Reverse oligo to amplify <i>ago1</i><br>from SD07515 into pattB plasmid      |
| 4151 | CTTCGCTTCGGTTGCGACTCGTCCA                                                                                                                                                                                             | Top oligo of gRNA 1 for <i>rox8</i><br>locus                                 |
| 4152 | AAACTGGACGAGTCGCAACCGAAGC                                                                                                                                                                                             | Bottom oligo of gRNA 1 for <i>rox8</i><br>locus                              |
| 4153 | CTTCGCGCGAAGGCTGCTGCGATT                                                                                                                                                                                              | Top oligo of gRNA for <i>rin</i> locus                                       |
| 4154 | AAACAATCGCAGCAGCCTTCGCCGC                                                                                                                                                                                             | Bottom oligo of gRNA for <i>rin</i><br>locus                                 |
| 4158 | AGCGGAGACAAAGAATCCGAGTCGAAGAGTCCGTAGTTCAGAGAGGA<br>AGAATCAAACGCCAGCTATGTACCCATACGATGTGCCCGATTACGCCTA<br>CCCGTATGACGTCCCGACTATGCCGTATGGATGCGACGCAATCGCA<br>GCAGCCTTCGCCCAATCTGTGGGACGCGAGTTTGTCCGCCAGTACTA<br>CACGCTGT | ssODN repair template for <i>rin</i><br>locus containing 2XHA epitope<br>tag |
| 4179 | AAGCGATGCAAGTGGTTGGGCGCC                                                                                                                                                                                              | Amplifies <i>rin</i> ::ha fragment paired<br>with 4184                       |
| 4184 | GATGTGCCCGATTACGCCTACCCG                                                                                                                                                                                              | Amplifies <i>rin</i> ::ha fragment paired<br>with 4179                       |
| 4189 | GAATACAAGAAGAGAAGTCTGAATCAAACAATGGACGAGTCGCAAC<br>CGAAGACCCTATA                                                                                                                                                       | Forward oligo to amplify <i>rox8</i><br>from FM011201 into pattB<br>plasmid  |
| 4190 | GTAGTCGCCGTCGTGATCCTTGTAACTGCTTGGGTCTGGTATTGTGGC<br>ATCGCAGCACT                                                                                                                                                       | Reverse oligo to amplify <i>rox8</i><br>from FM011201 into pattB<br>plasmid  |
| 4266 | CCCTCTGTTGGGCTGGACTCCACGGCGGCCGCACCTTCGGCTGCAAA<br>TACCGCTACTGT                                                                                                                                                       | Forward oligo to amplify <i>caprin</i><br>from LP14942 into pattB plasmid    |
| 4267 | ACAGAAGTAAGGTTCTTACAAAAGATCCTTCAGTTTTTGTCTCCAGC<br>CCGAGTGGCAT                                                                                                                                                        | Reverse oligo to amplify <i>caprin</i><br>from LP14942 into pattB plasmid    |

|      |                                                                  |                                                                             |
|------|------------------------------------------------------------------|-----------------------------------------------------------------------------|
| 4285 | ACGACCGAAAACCTGTATTTTCAGGGCGCCGACGAGTCGCAACCGAAG<br>ACCCTATACGTG | Forward oligo to amplify <i>rox8</i><br>from FM011201 into<br>pHIS.parallel |
| 4286 | ACTAGTTGAGCTCGTCGACGTAGGCCTTTGTCATTGGGTCTGGTATTGT<br>GGCATCGCAGC | Reverse oligo to amplify <i>rox8</i><br>from FM011201 into<br>pHIS.parallel |
| 4309 | CTTCGAAGACCCGCACGTCCTGGA                                         | Top oligo of gRNA 2 for <i>rox8</i><br>locus                                |
| 4310 | AAACTCCAGGACGTGCGGGTCTTC                                         | Bottom oligo of gRNA 2 for <i>rox8</i><br>locus                             |
| 4384 | AGCTACCCGCCATCGCCCGGAGC                                          | Reverse oligo to right of right<br>homology arm sequence of <i>rox8</i>     |
| 4397 | TGGGGTGTGCCCTTCGCTGAAGCAGGTGGGCCCTCGTCTCGCTGGCG<br>TGCCTGAGTGTG  | Amplifies left homology from<br><i>rox8</i> locus paired with 4398          |
| 4398 | CATGGCTGTCGGATGTCACGGGACTGTGGC                                   | Amplifies left homology from<br><i>rox8</i> locus paired with 4397          |
| 4399 | TAGTAAAGATCTCCATGCATAAGGCGCGCGGGTCTTCAAGGACAAG<br>GGCTTCTCGTTC   | Amplifies right homology from<br><i>rox8</i> locus paired with 4400         |
| 4400 | ACTCGATTGACGGAAGAGCCTCGAGCTGCACAGTTGTCGCCGGCGTGG<br>ATCACTTGAAGT | Amplifies right homology from<br><i>rox8</i> locus paired with 4399         |
| 4417 | ACCGTGTGTGTCACCCGCCCGCCGG                                        | Forward oligo to left of left<br>homology arm sequence of <i>rox8</i>       |
| 4420 | GATCTCCATGCATAAGGCGCGCGCG                                        | Forward oligo to dsRed                                                      |
